# Supplementary material for: Cancer antigen-125 plasma level as a biomarker of new-onset atrial fibrillation in postmenopausal women
Source: PubMed Central journal article supplement — Heart. 2017 Mar 11;103(17):1368–73. doi: 10.1136/heartjnl-2016-310272 (PMC5561355; doi:10.1136/heartjnl-2016-310272), 2017-03-11
Supplement: heartjnl-2016-310272supp001.pdf [file heartjnl-2016-310272supp001.pdf]

**Supplemental Table 1. Health Check Program**

|                                     |                                                                                                                                                                                                    |
|-------------------------------------|----------------------------------------------------------------------------------------------------------------------------------------------------------------------------------------------------|
| <b>physical measurement</b>         | height, weight, waist circumference, BP, PR                                                                                                                                                        |
| <b>laboratory measurement</b>       |                                                                                                                                                                                                    |
| complete blood cell counts          | WBC(Neut, Stab, Seg, Mono, Lymph, Eos), RBC(MCV, MCHC,MCH), Hb, Ht, Plt                                                                                                                            |
| serum chemistry                     | TP, Alb, ZTT, TTT, AST, ALT, LDH, T-B, D-B, ALP, $\gamma$ -GTP, ChE, Amy, LAP<br>BUN, Cr, Na, K, Cl, Ca, P, TC, TG, LDL-C, HDL-C, UA, FPG, HbA1c, Insulin, hsCRP, Fe<br>TSH, free T3, free T4, BNP |
| urine analysis                      | pH, urine specific gravity, u-pro, u-glu, u-uro,u-keton, WBC, RBC,                                                                                                                                 |
| tumor marker                        | CEA, CA19-9, CA-125, AFP, PSA                                                                                                                                                                      |
| <b>chest , abdominal Xp</b>         |                                                                                                                                                                                                    |
| <b>EKG</b>                          |                                                                                                                                                                                                    |
| <b>head, chest, abdominal CT</b>    |                                                                                                                                                                                                    |
| <b>2-dimensional echocardiogram</b> | AOD,LAD, IVST, PWT, LVDd, LVDs, FS, EF, E/A, DCT, e', E/e', RVSP                                                                                                                                   |
| <b>carotid duplex</b>               |                                                                                                                                                                                                    |
| <b>abdominal ultrasound</b>         |                                                                                                                                                                                                    |
| <b>ABI, PWV</b>                     |                                                                                                                                                                                                    |
| <b>spirogram</b>                    | VC, %VC, FEV1.0                                                                                                                                                                                    |
| <b>gastrography</b>                 |                                                                                                                                                                                                    |
| <b>eyesight test</b>                |                                                                                                                                                                                                    |
| <b>hearing test</b>                 |                                                                                                                                                                                                    |
| <b>fibergastroscope</b>             | Optional                                                                                                                                                                                           |
| <b>colonoscopy</b>                  | Optional                                                                                                                                                                                           |
| <b>head MRI and MRA</b>             | Optional                                                                                                                                                                                           |
